# Supplementary material
Source: ML conference proceedings conference paper supplement (https://proceedings.neurips.cc/paper_files/paper/2018/hash/08fc80de8121419136e443a70489c123-Abstract.html)
Supplement: Supplementary file [file 08fc80de8121419136e443a70489c123-Supplemental.zip]

## A Proof of Theorem 6

We establish Theorem 6 in this section. First, we introduce the notion of contiguity of measures

**Definition 2.** Let  $\{P_n\}$  and  $\{Q_n\}$  be two sequences of probability measures on the measurable space  $(\Omega_n, \mathcal{F}_n)$ . We say that  $P_n$  is contiguous to  $Q_n$  if for any sequence of events  $A_n$  with  $Q_n(A_n) \rightarrow 0$ ,  $P_n(A_n) \rightarrow 0$ .

It is standard that for two sequences of probability measures  $P_n$  and  $Q_n$  with  $P_n$  contiguous to  $Q_n$ ,  $\limsup_{n \rightarrow \infty} d_{TV}(P_n, Q_n) < 1$ . The following lemma provides sufficient conditions for establishing contiguity of two sequence of probability measures.

**Lemma 10** (see e.g. [MRZ15]). Let  $P_n$  and  $Q_n$  be two sequences of probability measures on  $(\Omega_n, \mathcal{F}_n)$ . Then  $P_n$  is contiguous to  $Q_n$  if

$$\mathbb{E}_{Q_n} \left[ \left( \frac{dP_n}{dQ_n} \right)^2 \right]$$

exists and remains bounded as  $n \rightarrow \infty$ .

Our next result establishes that asymptotically error-free detection is impossible below the conjectured detection boundary.

**Lemma 11.** Let  $\lambda, \mu > 0$  with  $\lambda^2 + \frac{\mu^2}{\gamma} < 1$ . Then  $\mathbb{P}_{\lambda, \mu}$  is contiguous to  $\mathbb{P}_{0,0}$ .

To establish that consistent detection is possible above this boundary, we need the following lemma. Recall the matrices  $A, B$  from the Gaussian model (8), (9).

**Lemma 12.** Let  $b_* = \frac{2\mu}{\lambda\gamma}$ . Define

$$T = \sup_{\|x\|=\|y\|=1} [\langle x, Ax \rangle + b_* \langle x, By \rangle].$$

(i) Under  $\mathbb{P}_{0,0}$ , as  $n, p \rightarrow \infty$ ,  $T \rightarrow 2\sqrt{1 + \frac{b_*^2\gamma}{4}} + b_*$  almost surely.

(ii) Let  $\lambda, \mu > 0$ ,  $\varepsilon > 0$ , with  $\lambda^2 + \frac{\mu^2}{\gamma} > 1 + \varepsilon$ . Then as  $n, p \rightarrow \infty$ ,

$$\mathbb{P}_{\lambda, \mu} \left( T > 2\sqrt{1 + \frac{b_*^2\gamma}{4}} + b_* + \delta \right) \rightarrow 1,$$

where  $\delta := \delta(\varepsilon) > 0$ .

(iii) Further, define

$$\tilde{T}(\tilde{\delta}) = \sup_{\|x\|=\|y\|=1, 0 < \langle x, v \rangle < \tilde{\delta}\sqrt{n}} [\langle x, Ax \rangle + b_* \langle x, By \rangle].$$

Then for each  $\delta > 0$ , there exists  $\tilde{\delta} > 0$  sufficiently small, such that as  $n, p \rightarrow \infty$ ,

$$\mathbb{P}_{\lambda, \mu} \left( \tilde{T}(\tilde{\delta}) < 2\sqrt{1 + \frac{b_*^2\gamma}{4}} + b_* + \frac{\delta}{2} \right) \rightarrow 1.$$

We defer the proofs of Lemma 11 and Lemma 12 to Sections A.1 and Section A.5 respectively, and complete the proof of Theorem 6, armed with these results.

*Proof of Theorem 6.* The proof is comparatively straightforward, once we have Lemma 11 and 12. Note that Lemma 11 immediately implies that  $\mathbb{P}_{\lambda, \mu}$  is contiguous to  $\mathbb{P}_{0,0}$  for  $\lambda^2 + \frac{\mu^2}{\gamma} < 1$ .

Next, let  $\lambda, \mu > 0$  such that  $\lambda^2 + \frac{\mu^2}{\gamma} > 1 + \varepsilon$  for some  $\varepsilon > 0$ . In this case, consider the test which rejects the null hypothesis  $H_0$  if  $T > 2\sqrt{1 + \frac{b_*^2\gamma}{4}} + b_* + \delta$ . Lemma 12 immediately implies that the Type I and II errors of this test vanish in this setting.

Finally, we prove that weak recovery is possible whenever  $\lambda^2 + \frac{\mu^2}{\gamma} > 1$ . To this end, let  $(\hat{x}, \hat{y})$  be the maximizer of  $\langle x, Ax \rangle + b_* \langle y, Bx \rangle$ , with  $\|x\| = \|y\| = 1$ . Combining parts (ii) and (iii) of Lemma 12, we conclude that  $\hat{x}$  achieves weak recovery of the community assignment vector.  $\square$

### A.1 Proof of Lemma 11

Fix  $\lambda, \mu > 0$  satisfying  $\lambda^2 + \frac{\mu^2}{\gamma} < 1$ . We start with the likelihood,

$$L(u, v) = \frac{d\mathbb{P}_{\lambda, \mu}}{d\mathbb{P}_{0,0}} = L_1(u, v)L_2(u, v),$$

$$L_1(u, v) = \exp \left[ \frac{\lambda}{2} \langle A, vv^T \rangle - \frac{\lambda^2 n}{4} \right]. \quad (40)$$

$$L_2(u, v) = \exp \left[ p \sqrt{\frac{\mu}{n}} \langle B, uv^T \rangle - \frac{\mu p}{2} \|u\|^2 \right]. \quad (41)$$

We denote the prior joint distribution of  $(u, v)$  as  $\pi$ , and set

$$L_\pi = \mathbb{E}_{(u, v) \sim \pi} [L(u, v)].$$

To establish contiguity, we bound the second moment of  $L_\pi$  under the null hypothesis, and appeal to Lemma 10. In particular, we denote  $\mathbb{E}_0[\cdot]$  to be the expectation operator under the distribution  $P_{(0,0)}$  and compute

$$\mathbb{E}_0[L_\pi^2] = \mathbb{E}_0[\mathbb{E}_{(u_1, v_1), (u_2, v_2)} [L(u_1, v_1)L(u_2, v_2)]] = \mathbb{E}_{(u_1, v_1), (u_2, v_2)} [\mathbb{E}_0 [L(u_1, v_1)L(u_2, v_2)]] ,$$

where  $(u_1, v_1), (u_2, v_2)$  are i.i.d. draws from the prior  $\pi$ , and the last equality follows by Fubini's theorem. We have, using (40) and (41),

$$\begin{aligned} & L(u_1, v_1)L(u_2, v_2) \\ &= \exp \left[ -\frac{\lambda^2 n}{2} - \frac{\mu p}{2n} (\|u_1\|^2 + \|u_2\|^2) + \frac{\lambda}{2} \langle A, v_1 v_1^T + v_2 v_2^T \rangle + p \sqrt{\frac{\mu}{n}} \langle B, u_1 v_1^T + u_2 v_2^T \rangle \right]. \end{aligned}$$

Taking expectation under  $\mathbb{E}_0[\cdot]$ , upon simplification, we obtain,

$$\mathbb{E}_0[L_\pi^2] = \mathbb{E}_{(u_1, v_1), (u_2, v_2)} \left[ \exp \left[ \frac{\lambda^2}{2n} \langle v_1, v_2 \rangle^2 + \frac{\mu p}{n} \langle u_1, u_2 \rangle \langle v_1, v_2 \rangle \right] \right] \quad (42)$$

$$= \mathbb{E}_{(u_1, v_1), (u_2, v_2)} \left[ \exp \left[ n \left( \frac{\lambda^2}{2} \left( \frac{\langle v_1, v_2 \rangle}{n} \right)^2 + \frac{\mu}{\gamma} \langle u_1, u_2 \rangle \frac{\langle v_1, v_2 \rangle}{n} \right) \right] \right] \quad (43)$$

$$= \mathbb{E} \left[ \exp \left[ n \left( \frac{\lambda^2}{2} X^2 + \frac{\mu}{\gamma} XY \right) \right] \right] \quad (44)$$

Here that  $X, Y \in [-1, +1]$  are independent, with  $X$  distributed as the normalized sum of  $n$  Radamacher random variables, and  $Y$  as the first coordinate of a uniform vector on the unit sphere. In particular, defining  $h(s) = -((1+s)/2) \log((1+s)) - ((1-s)/2) \log((1-s))$ , and denoting by  $f_Y$  the density of  $Y$ , we have, for  $s \in (2/n)\mathbb{Z}$

$$\mathbb{P}(X = s) = \frac{1}{2^n} \binom{n}{n(1+s/2)} \quad (45)$$

$$\leq \frac{C}{n^{1/2}} e^{nh(s)} \quad (46)$$

$$f_Y(y) = \frac{\Gamma(p/2)}{\Gamma((p-1)/2)\Gamma(1/2)} (1-y^2)^{(p-3)/2} \quad (47)$$

$$\leq C\sqrt{n}(1-y^2)^{p/2}. \quad (48)$$

Approximating sums by integrals, and using  $h(s) \leq -s^2/2$ , we get

$$\mathbb{E}_0[L_\pi^2] \leq Cn \int_{[-1,1]^2} \exp \left\{ n \left[ \frac{\lambda^2}{2} s^2 + \frac{\mu}{\gamma} sy + h(s) + \frac{1}{2\gamma} \log(1-y^2) \right] \right\} ds dy \quad (49)$$

$$\leq Cn \int_{\mathbb{R}^2} \exp \left\{ n \left[ \frac{\lambda^2}{2} s^2 + \frac{\mu}{\gamma} sy - \frac{s^2}{2} - \frac{y^2}{2\gamma} \right] \right\} ds dy \leq C'. \quad (50)$$

The last step holds for  $\lambda^2 + \mu^2/\gamma < 1$ .

Next, we turn to the proof of Lemma 12. This is the main technical contribution of this paper, and uses a novel Gaussian process comparison argument based on Sudakov-Fernique comparison.

## A.2 A Gaussian process comparison result

Let  $Z \sim \mathbb{R}^{p \times n}$  and  $W \sim \mathbb{R}^{n \times n}$  denote random matrices with independent entries as follows.

$$W_{ij} \sim \begin{cases} \mathcal{N}(0, \rho/n) & \text{if } i < j \\ \mathcal{N}(0, 2\rho/n) & \text{if } i = j \end{cases} \quad (51)$$

$$\begin{aligned} \text{where } W_{ij} &= W_{ji}, \\ Z_{ai} &\sim \mathcal{N}(0, \tau/p). \end{aligned} \quad (52)$$

For an integer  $N > 0$ , we let  $\mathbb{S}^N$  denote the sphere of radius  $\sqrt{N}$  in  $N$  dimensions, i.e.  $\mathbb{S}^N = \{x \in \mathbb{R}^N : \|x\|_2^2 = N\}$ . Furthermore let  $u_0 \in \mathbb{S}^p$  and  $v_0 \in \{\pm 1\}^n$  be fixed vectors. We denote the standard inner product between vectors  $x, y \in \mathbb{R}^N$  as  $\langle x, y \rangle = \sum_i x_i y_i$ . The normalized version will be useful as well: we define  $\langle x, y \rangle_N \equiv \sum_i x_i y_i / N$ .

We are interested in characterizing the behavior of the following optimization problem in the limit high-dimensional limit  $p, n \rightarrow \infty$  with constant aspect ratio  $n/p = \gamma \in (0, \infty)$ .

$$\text{OPT}(\lambda, \mu, b) \equiv \frac{1}{n} \mathbb{E} \max_{(x, y) \in \mathbb{S}^n \times \mathbb{S}^p} \left[ \left( \frac{\lambda}{n} \langle x, v_0 \rangle^2 + \langle x, Wx \rangle \right) + b \left( \sqrt{\frac{\mu}{np}} \langle x, v_0 \rangle \langle y, u_0 \rangle + \langle y, Zx \rangle \right) \right].$$

We now introduce two different comparison processes which give upper and lower bounds to  $\text{OPT}(\lambda, \mu, b)$ . Their asymptotic values will coincide in the high dimensional limit  $n, p \rightarrow \infty$  with  $n/p = \gamma$ . Let  $g_x, g_y, W_x$  and  $W_y$  be:

$$g_x \sim \mathcal{N}(0, (4\rho + b^2\tau)\mathbf{I}_n) \quad (53)$$

$$g_y \sim \mathcal{N}(0, b^2\tau n/p \mathbf{I}_p), \quad (54)$$

$$(W_x)_{ij} \sim \begin{cases} \mathcal{N}(0, (4\rho + b^2\tau)/n) & \text{if } i < j \\ \mathcal{N}(0, 2(4\rho + b^2\tau)/n) & \text{if } i = j \end{cases} \quad (55)$$

$$(W_y)_{ij} \sim \begin{cases} \mathcal{N}(0, b^2\tau n/p^2) & \text{if } i < j \\ \mathcal{N}(0, 2b^2\tau n/p^2) & \text{if } i = j \end{cases} \quad (56)$$

**Proposition 13.** *We have*

$$\begin{aligned} \text{OPT}(\lambda, \mu, b) &\leq \frac{1}{n} \mathbb{E} \max_{(x, y) \in \mathbb{S}^n \times \mathbb{S}^p} \left[ \frac{\lambda}{n} \langle x, v_0 \rangle^2 + \langle x, g_x \rangle + b \sqrt{\frac{\mu}{np}} \langle x, v_0 \rangle \langle y, u_0 \rangle + \langle y, g_y \rangle \right] \\ \text{OPT}(\lambda, \mu, b) &\geq \frac{1}{n} \mathbb{E} \max_{(x, y) \in \mathbb{S}^n \times \mathbb{S}^p} \left[ \frac{\lambda}{n} \langle x, v_0 \rangle^2 + \frac{1}{2} \langle x, W_x x \rangle + b \sqrt{\frac{\mu}{np}} \langle x, v_0 \rangle \langle y, u_0 \rangle + \frac{1}{2} \langle y, W_y y \rangle \right] \end{aligned} \quad (57)$$

*Proof.* The proof is via Sudakov-Fernique inequality. First we compute the distances induced by the three processes. For any pair  $(x, y), (x', y')$ :

$$\begin{aligned} \frac{1}{4n} (\mathbb{E} \{ (\langle x, Wx \rangle + b \langle y, Zx \rangle - \langle x', Wx' \rangle - b \langle y', Zx' \rangle)^2 \}) &= \rho(1 - \langle x, x' \rangle_n^2) + \frac{b^2\tau}{2}(1 - \langle x, x' \rangle_n \langle y, y' \rangle_p) \\ \frac{1}{n} (\mathbb{E} \{ (\langle x, g_x \rangle + \langle y, g_y \rangle - \langle x', g_x \rangle - \langle y', g_y \rangle)^2 \}) &= 2(4\rho + b^2\tau)(1 - \langle x, x' \rangle_n) + 2b^2\tau(1 - \langle y, y' \rangle_p) \\ \frac{1}{4n} (\mathbb{E} \{ (\langle x, W_x x \rangle + \langle y, W_y y \rangle - \langle x', W_x x' \rangle - \langle y', W_y y' \rangle)^2 \}) &= (\rho + \frac{b^2\tau}{4})(1 - \langle x, x' \rangle_n^2) + \frac{b^2\tau}{4}(1 - \langle y, y' \rangle_p^2). \end{aligned}$$

This immediately gives:

$$\begin{aligned}
& \frac{1}{n} (\mathbb{E} \{ (\langle x, Wx \rangle + b \langle y, Zx \rangle - \langle x', Wx' \rangle - b \langle y', Zx' \rangle)^2 \}) - \\
& \frac{1}{n} (\mathbb{E} \{ (\langle x, g_x \rangle + \langle y, g_y \rangle - \langle x', g_x \rangle - \langle y, g'_y \rangle)^2 \}) \\
& = -4\rho(1 - \langle x, x' \rangle_n)^2 - 2b^2\tau(1 - \langle x, x' \rangle_n)(1 - \langle y, y' \rangle_p) \leq 0, \\
& \frac{1}{4n} (\mathbb{E} \{ (\langle x, Wx \rangle + b \langle y, Zx \rangle - \langle x', Wx' \rangle - b \langle y', Zx' \rangle)^2 \}) - \\
& \frac{1}{4n} (\mathbb{E} \{ (\langle x, W_x x \rangle + \langle y, W_y y \rangle - \langle x', W_x x \rangle - \langle y', W_y y' \rangle)^2 \}) \\
& = \frac{b^2\tau}{4} (\langle x, x' \rangle_n - \langle y, y' \rangle_p)^2 \geq 0.
\end{aligned}$$

The claim follows.  $\square$

An immediate corollary of this is the following tight characterization for the null value, i.e. the case when  $\mu = \lambda = 0$ :

**Corollary 14.** *For any  $\rho, \tau$  as  $n, p$  diverge with  $n/p \rightarrow \gamma$ , we have*

$$\lim_{n \rightarrow \infty} \text{OPT}(0, 0) = \sqrt{4\rho + b^2\tau} + b\sqrt{\frac{\tau}{\gamma}} \quad (58)$$

Note that this upper bound generalizes the maximum eigenvalue and singular value bounds of  $W$ ,  $Z$  respectively. In particular, the case  $\tau = 0$  corresponds to the maximum eigenvalue of  $W$ , which yields  $\text{OPT} = 2\sqrt{\rho}$  while the maximum singular value of  $Z$  can be recovered by setting  $\rho$  to 0 and  $b$  to 1, yielding  $\text{OPT} = \sqrt{\tau}(1 + \gamma^{-1/2})$ . Corollary 14 demonstrates the limit for the case when  $\mu = \lambda = 0$ . The following theorem gives the limiting value when  $\lambda, \mu$  may be nonzero.

**Theorem 15.** *Suppose  $G : \mathbb{R} \times \mathbb{R}_+ \rightarrow \mathbb{R}$  is as follows:*

$$G(\kappa, \sigma^2) = \begin{cases} \kappa/2 + \sigma^2/2\kappa & \text{if } \kappa^2 \geq \sigma^2, \\ \sigma & \text{otherwise.} \end{cases} \quad (59)$$

*Then the optimal value  $\text{OPT}(\lambda, \mu)$  is*

$$\lim_{n \rightarrow \infty} \text{OPT}(\lambda, \mu) = \min_{t \geq 0} \{ G(2\lambda + b\mu t, 4\rho + b^2\tau) + \gamma^{-1} G(b/t, b^2\gamma\tau) \}. \quad (60)$$

*If the minimum above occurs at  $t = t_*$  such that  $G'(2\lambda + b\mu t_*, 4\rho + b^2\tau) = \partial_\kappa G(\kappa, 4\rho + b^2\tau)|_{\kappa=2\lambda+b\mu t_*} > 0$ , then  $\lim_{n \rightarrow \infty} \text{OPT}(\lambda, \mu) > \sqrt{4\rho + b^2\tau} + \gamma^{-1} \sqrt{\frac{\tau}{\gamma}}$ .*

### A.3 Proof of Theorem 15: the upper bound

The following lemma removes the effect of the projection of  $g_x$  ( $g_y$ ) along  $v_0$  (resp.  $u_0$ ). Let  $F(x, y) = \frac{1}{n} [\lambda x_1^2 + \langle x, g_x \rangle + b\sqrt{\mu}x_1y_1 + \langle y, g_y \rangle]$ . Further, let  $\tilde{g}_x$  ( $\tilde{g}_y$ ) be the vectors obtained by setting the first coordinate of  $g_x$  (resp.  $g_y$ ) to zero, and  $\tilde{F}(x, y) = \frac{1}{n} [\lambda x_1^2 + \langle x, \tilde{g}_x \rangle + b\sqrt{\mu}x_1y_1 + \langle y, \tilde{g}_y \rangle]$ .

**Lemma 16.** *The optima of  $F$  and  $\tilde{F}$  differ by at most  $o(1)$ . More precisely:*

$$\left| \mathbb{E} \max_{x, y} F(x, y) - \mathbb{E} \max_{x, y} \tilde{F}(x, y) \right| = O\left(\frac{1}{\sqrt{n}}\right).$$

*Proof.* For any  $x, y$ :

$$\begin{aligned}
F(x, y) &= \frac{1}{n} \left( \lambda x_1^2 + \langle x, g_x \rangle + \sqrt{\mu}x_1y_1 + \langle y, g_y \rangle \right) = \tilde{F}(x, y) + \frac{1}{n} (x_1(g_x)_1 + y_1(g_y)_1) \\
\left| F(x, y) - \tilde{F}(x, y) \right| &\leq \frac{1}{n} (\sqrt{n}|(g_x)_1| + \sqrt{p}|(g_y)_1|).
\end{aligned}$$

Maximizing each side over  $x, y$  and taking expectation yields the lemma.  $\square$

With this in hand, we can concentrate on computing the maximum of  $\tilde{F}(x, y)$ .

**Lemma 17.** *Let  $\tilde{g}_x$  ( $\tilde{g}_y$ ) be the projection of  $g_x$  (resp.  $g_y$ ) orthogonal to the first basis vector. Then*

$$\limsup_{n \rightarrow \infty} \mathbb{E} \max_{(x, y) \in \mathbb{S}^n \times \mathbb{S}^p} \tilde{F}(x, y) \leq \min_{t \leq 0} G(2\lambda + b\mu t, 4\rho + b^2\tau) + \frac{1}{\gamma} G(b/t, b^2\gamma\tau) \quad (61)$$

*Proof.* Since  $\tilde{F}(x, y)$  increases if we align the signs of  $x_1$  and  $y_1$  to +1, we can assume that they are positive. Furthermore, for fixed, positive  $x_1, y_1$ ,  $\tilde{F}$  is maximized if the other coordinates align with  $\tilde{g}_x$  and  $\tilde{g}_y$  respectively. Therefore:

$$\begin{aligned} \max_{x, y} \tilde{F}(x, y) &= \max_{x_1 \in [0, \sqrt{n}], y_1 \in [0, \sqrt{p}]} \frac{\lambda x_1^2}{n} + \sqrt{1 - \frac{x_1^2}{n}} \frac{\|\tilde{g}_x\|}{\sqrt{n}} + \frac{b\sqrt{\mu x_1 y_1}}{n} + \sqrt{1 - \frac{y_1^2}{p}} \frac{\sqrt{p} \|\tilde{g}_y\|}{n} \\ &= \max_{m_1, m_2 \in [0, 1]} \lambda m_1 + \sqrt{1 - m_1} \frac{\|\tilde{g}_x\|}{\sqrt{n}} + b\sqrt{\frac{\mu m_1 m_2 p}{n}} + \sqrt{1 - m_2} \frac{\sqrt{p} \|\tilde{g}_y\|}{n} \\ &\leq \max_{m_1, m_2 \in [0, 1]} \left( \lambda + \frac{b\mu t}{2} \right) m_1 + \sqrt{1 - m_1} \frac{\|\tilde{g}_x\|}{\sqrt{n}} + \frac{p}{n} \left( \frac{bm_2}{2t} + \sqrt{1 - m_2} \frac{\|\tilde{g}_y\|}{\sqrt{p}} \right) \\ &= G(2\lambda + b\mu t, \|\tilde{g}_x\|^2/n) + \frac{1}{\gamma} G\left(\frac{b}{t}, \|\tilde{g}_y\|^2/p\right), \end{aligned} \quad (62)$$

where the first equality is change of variables, the second inequality is the fact that  $2\sqrt{ab} = \min_{t \geq 0} (at + b/t)$ , and the final equality is by direct calculus.

Now let  $t_*$  be any minimizer of  $G(2\lambda + b\mu t, 4\rho + b^2\tau) + \gamma^{-1}G(b/t, b^2\gamma\tau)$ . We may assume that  $t_* \notin \{0, \infty\}$ , otherwise we can use  $t_*(\varepsilon)$ , an  $\varepsilon$ -approximate minimizer in  $(0, \infty)$  in the argument below. Since the above holds for any  $t$ , we have:

$$\max_{x, y} \tilde{F}(x, y) \leq G(2\lambda + b\mu t_*, \|\tilde{g}_x\|^2/n) + \gamma^{-1}G(b/t_*, \|\tilde{g}_y\|^2/p). \quad (63)$$

By the strong law of large numbers,  $\|\tilde{g}_x\|^2/n \rightarrow 4\rho + b^2\tau$  and  $\|\tilde{g}_y\|^2/p \rightarrow b^2\gamma\tau$  almost surely. Further, as  $G(\kappa, \sigma^2)$  is continuous in the second argument on  $(0, \infty)$ , when  $\kappa \notin \{0, \infty\}$ , almost surely:

$$\limsup_{n \rightarrow \infty} \max_{x, y} \tilde{F}(x, y) \leq G(2\lambda + b\mu t_*, 4\rho + b^2\tau) + \gamma^{-1}G(b/t_*, b^2\gamma\tau). \quad (64)$$

Taking expectations and using bounded convergence yields the lemma.  $\square$

We can now prove the upper bound.

*Theorem 15, upper bound.* Using Proposition 13, Lemma 16 and Lemma 17 in order:

$$\text{OPT}(\lambda, \mu) \leq \mathbb{E}\{\max_{x, y} F(x, y)\} \quad (65)$$

$$\leq \mathbb{E}\{\max_{x, y} \tilde{F}(x, y)\} + o(n^{-1/3}) \quad (66)$$

$$\leq \min_t G(2\lambda + b\mu t, 4\rho + b^2\tau) + \frac{1}{\gamma} G(b/t, b^2\gamma\tau) + o(n^{-1/3}). \quad (67)$$

Taking limit  $p \rightarrow \infty$  yields the result.  $\square$

#### A.4 Proof of Theorem 15: the lower bound

Recall that  $t_*$  denotes the optimizer of the upper bound  $G(2\lambda + b\mu t, 4\rho + b^2\tau) + \gamma^{-1}G(b/t, b^2\gamma\tau)$ . By stationarity, we have:

$$b\mu G'(2\lambda + b\mu t_*, 4\rho + b^2\tau) - \frac{b}{\gamma t_*^2} G'\left(\frac{b}{t_*}, b^2\gamma\tau\right) = 0. \quad (68)$$

Now we proceed in two cases. First, suppose  $G'(2\lambda + b\mu t_*, 4\rho + b^2\tau) = 0$ . In this case  $G'(b/t_*, b^2\gamma\tau)/t_*^2 = 0$ , whence  $G'(b/t_*, b^2\gamma\tau) = 0$ . Indeed, the case when  $t_* = \infty$  also satisfies this. However, this also implies that  $2\lambda + b\mu t_* \leq \sqrt{4\rho + b^2\tau}$  and  $t_* \geq (\gamma\tau)^{-1/2}$ , whereby  $G(2\lambda + b\mu t_*, 4\rho + b^2\tau) = \sqrt{4\rho + b^2\tau}$  and  $G'(b/t_*, b^2\gamma\tau) = b\sqrt{\gamma\tau}$ . In this case we consider  $\tilde{x}, \tilde{y}$  to be the principal eigenvectors of  $W_x, W_y$  rescaled to norms  $\sqrt{n}, \sqrt{p}$  respectively and, hence using (57),

$$\text{OPT}(\lambda, \mu, b) \geq \frac{1}{2n} \mathbb{E} \left[ \langle \tilde{x}, W_x \tilde{x} \rangle + \langle \tilde{y}, W_y \tilde{y} \rangle \right] - o(1). \quad (69)$$

By standard results on GOE matrices the right hand side converges to  $\sqrt{4\rho + b^2\tau} + b\sqrt{\frac{\tau}{\gamma}}$  implying the required lower bound.

Now consider the case that  $G'(2\lambda + b\mu t_*, 4\rho + b^2\tau) > 0$ . Importantly, by stationarity we have

$$t_*^2 = \frac{G'(bt_*^{-1}, b^2\gamma\tau)}{\mu\gamma G'(2\lambda + b\mu t_*, 4\rho + b^2\tau)}, \quad (70)$$

and that  $t_*$  is finite since the numerator is decreasing in  $t_*$ . The key ingredient to prove the lower bound is the following result on the principal eigenvalue/eigenvector of a deformed GOE matrix.

**Theorem 18** ([CDMF<sup>+</sup>09, KY13]). *Suppose  $W \in \mathbb{R}^{n \times n}$  is a GOE matrix with variance  $\sigma^2$ , i.e.  $W_{ij} = W_{ji} \sim \mathcal{N}(0, (1 + \delta_{ij}\sigma^2/p))$  and  $A = \kappa v_0 v_0^\top + W$  where  $v_0$  is a unit vector. Then the following holds almost surely and in expectation:*

$$\lim_{n \rightarrow \infty} \lambda_1(A) = 2G(\kappa, \sigma^2) = \begin{cases} 2\sigma & \text{if } \kappa < \sigma \\ \kappa + \sigma^2/\kappa & \text{if } \kappa > \sigma. \end{cases} \quad (71)$$

$$\lim_{n \rightarrow \infty} \langle v_1(A), v_0 \rangle^2 = 2G'(\kappa, \sigma^2) = \begin{cases} 0 & \text{if } \kappa < \sigma, \\ 1 - \sigma^2/\kappa^2 & \text{if } \kappa > \sigma. \end{cases}, \quad (72)$$

where  $G'$  denotes the derivative with respect to the first argument.

For the prescribed  $t_*$ , define:

$$H(x, y) = \left( \lambda + \frac{b\mu t_*}{2} \right) \frac{\langle x, v_0 \rangle^2}{n^2} + \frac{\langle x, W_x x \rangle}{2n} + \frac{p}{n} \left( \frac{b\langle y, u_0 \rangle^2}{2t_* p^2} + \frac{\langle y, W_y y \rangle}{2p} \right) \quad (73)$$

Let  $\tilde{x}, \tilde{y}$  be the principal eigenvector of  $(2\lambda + b\mu t_*)v_0 v_0^\top/n + W_x, bt_*^{-1}u_0 u_0^\top/p + W_y$ , rescaled to norm  $\sqrt{n}$  and  $\sqrt{p}$  respectively. Further, we choose the sign of  $\tilde{x}$  so that  $\langle \tilde{x}, v_0 \rangle \geq 0$ , and analogously for  $\tilde{y}$ . Now, fixing an  $\varepsilon > 0$ , we have by Theorem 18, for every  $p$  large enough:

$$H(\tilde{x}, \tilde{y}) \geq G(2\lambda + b\mu t_*, 4\rho + b^2\tau) + \gamma^{-1}G(bt_*^{-1}, b^2\gamma\tau) - \varepsilon \quad (74)$$

$$\frac{\langle \tilde{x}, v_0 \rangle}{n} = \sqrt{2G'(2\lambda + b\mu t_*, 4\rho + b^2\tau)} + O(\varepsilon) \quad (75)$$

$$\frac{\langle \tilde{y}, u_0 \rangle}{p} = \sqrt{2G'(bt_*^{-1}, b^2\gamma\tau)} + O(\varepsilon) \quad (76)$$

We have, therefore:

$$\begin{aligned} \text{OPT}(\lambda, \mu, b) &\geq \mathbb{E} \left[ H(\tilde{x}, \tilde{y}) + \left( \frac{b}{n} \sqrt{\frac{\mu}{np}} \langle \tilde{x}, v_0 \rangle \langle \tilde{y}, u_0 \rangle - \frac{b\mu t_* \langle \tilde{x}, v_0 \rangle^2}{2n^2} - \frac{b\langle y, u_0 \rangle^2}{2tnp} \right) \right] \\ &\geq G(2\lambda + b\mu t_*, 4\rho + b^2\tau) + \gamma^{-1}G(bt_*^{-1}, b^2\gamma\tau) + O(\varepsilon(t_* \vee t_*^{-1})) \\ &\quad + \left( 2\sqrt{\frac{\mu}{\gamma}} G'(2\lambda + b\mu t_*, 4\rho + b^2\tau) G'(bt_*^{-1}, b^2\gamma\tau) - b\mu t_* G'(2\lambda + b\mu t_*, 4\rho + b^2\tau) \right. \\ &\quad \left. - \frac{G'(bt_*^{-1}, b^2\gamma\tau)}{\gamma t_*} \right) \\ &\geq G(2\lambda + b\mu t_*, 4\rho + b^2\tau) + \gamma^{-1}G(bt_*^{-1}, b^2\gamma\tau) + O(\varepsilon(t_* \vee t_*^{-1})). \end{aligned} \quad (77)$$

Here the first inequality since we used a specific guess  $\tilde{x}, \tilde{y}$ , the second using Theorem 18 and the final inequality follows since the remainder term vanishes due to Eq. (70). Taking expectations and letting  $\varepsilon$  going to 0 yields the required lower bound.

Given Corollary 14 and Theorem 15, it is not too hard to establish Lemma 12, which we proceed to do next.

### A.5 Proof of Lemma 12

Recall  $b_* = \frac{2\mu}{\lambda\gamma}$ . Part (i) follows directly from Corollary 14, upon setting  $\rho = \tau = 1$ , and  $b = b_*\sqrt{\gamma}$ . To establish part (ii), we use Theorem 15. In particular, it suffices to establish that with this specific choice of  $b = b_*\sqrt{\gamma}$ , for any  $(\lambda, \mu)$  with  $\lambda^2 + \mu^2/\gamma > 1$ , the minimizer  $t_*$  of  $G(2\lambda + b\mu t, 4 + b^2) + \gamma^{-1}G(b/t, b^2\gamma)$  satisfies  $G'(2\lambda + b\mu t_*, 4 + b^2) > 0$ . Let us assume, if possible, that  $G(2\lambda + b\mu t_*, 4 + b^2) = 0$ . Using the stationary point condition (68), in this case  $G'(b/t_*, b^2\gamma) = 0$ . Next, using the definition of  $G$  (59), observe that this implies

$$t_* > \frac{1}{\sqrt{\gamma}}, \quad 2\lambda + \frac{2\mu^2}{\lambda\sqrt{\gamma}}t_* < \sqrt{4 + \frac{4\mu^2}{\lambda^2\gamma}}.$$

These imply:

$$\frac{2}{\lambda} \left( \lambda^2 + \frac{\mu^2}{\gamma} \right) < 2\lambda + 2 \frac{\mu^2 t_*}{\lambda\mu\sqrt{\gamma}} \quad (79)$$

$$< \sqrt{4 + \frac{4\mu^2}{\lambda^2\gamma}} \quad (80)$$

$$= \frac{2}{\lambda} \sqrt{\lambda^2 + \frac{\mu^2}{\gamma}}. \quad (81)$$

That this is impossible whenever  $\lambda^2 + \frac{\mu^2}{\gamma} > 1$ . This establishes part (ii). To establish part (iii), we again use the upper bound from Proposition 13, and note that for  $0 < \langle x, v \rangle < \tilde{\delta}\sqrt{n}$ ,

$$\mathbb{E}[\tilde{T}(\tilde{\delta})] \leq \lambda\tilde{\delta}^2 + \sqrt{4 + b_*^2} + \max_{\|y\|=1} \{b_*\sqrt{\mu}\tilde{\delta}\langle u, y \rangle + \frac{1}{\gamma}\langle y, g \rangle\},$$

where  $g \sim \mathcal{N}(0, b^2\gamma I_p/p)$ . The proof follows using continuity in  $\tilde{\delta}$ . This completes the proof.

### B Proof of Lemma 8

Recall the distributional recursion specified by density evolution (Definition 1).

$$\begin{aligned} \bar{m}'|_U &\stackrel{d}{=} \mu U \mathbb{E}[V\bar{\eta}] + \zeta_1 \sqrt{\mu \mathbb{E}[\bar{\eta}^2]}, \\ \bar{\eta}'|_{V'=+1} &\stackrel{d}{=} \frac{\lambda}{\sqrt{d}} \left[ \sum_{k=1}^{k_+} \bar{\eta}_k|_+ + \sum_{k=1}^{k_-} \bar{\eta}_k|_- \right] - \lambda\sqrt{d}\mathbb{E}[\bar{\eta}] + \frac{\mu}{\gamma} \mathbb{E}[U\bar{m}] + \zeta_2 \sqrt{\frac{\mu}{\gamma} \mathbb{E}[\bar{m}^2]}, \end{aligned}$$

where  $V \sim U(\{\pm 1\})$ ,  $U \sim \mathcal{N}(0, 1)$ ,  $k_+ \sim \text{Poisson}\left(\frac{d+\lambda\sqrt{d}}{2}\right)$ ,  $k_- \sim \text{Poisson}\left(\frac{d-\lambda\sqrt{d}}{2}\right)$ ,  $\zeta_1, \zeta_2 \sim \mathcal{N}(0, 1)$  are all mutually independent. Further,  $\{\bar{\eta}_k|_+\}$  are iid random variables, distributed as  $\bar{\eta}|_{V=+1}$ . Similarly,  $\{\bar{\eta}_k|_-\}$  are iid random variables, distributed as  $\bar{\eta}|_{V=-1}$ . Finally, we require the collections to be mutually independent, and independent of the other auxiliary variables defined above.

Given these distributional recursions, we compute the vector of moments

$$\begin{aligned} \mathbb{E}[V'\bar{\eta}'] &= \lambda^2 \mathbb{E}[V\bar{\eta}] + \frac{\mu}{\gamma} \mathbb{E}[U\bar{m}] \\ \mathbb{E}[U'\bar{m}'] &= \mu \mathbb{E}[V\bar{\eta}] \\ \mathbb{E}[\bar{\eta}'^2] &= \lambda^2 \mathbb{E}[\bar{\eta}^2] + \frac{\mu^2}{\gamma^2} \mathbb{E}^2[U\bar{m}] + \frac{\mu}{\gamma} \mathbb{E}[\bar{m}^2] + 2 \frac{\lambda^2}{\gamma} \mathbb{E}[U\bar{m}] \mathbb{E}[V\bar{\eta}] \\ \mathbb{E}[\bar{m}'^2] &= \mu^2 \mathbb{E}^2[V\bar{\eta}] + \mu \mathbb{E}[\bar{\eta}^2] \end{aligned}$$

Thus the induced mapping on moments  $\phi^{\text{DE}} : \mathbb{R}^4 \rightarrow \mathbb{R}^4$ ,  $\phi^{\text{DE}}(z_1, z_2, z_3, z_4) = (\phi_1, \phi_2, \phi_3, \phi_4)$ , with

$$\begin{aligned}\phi_1 &= \lambda^2 z_1 + \frac{\mu}{\gamma} z_2 \\ \phi_2 &= \mu z_1 \\ \phi_3 &= \frac{\mu^2}{\gamma^2} z_2^2 + \frac{2\lambda^2}{\gamma} z_1 z_2 + \lambda^2 z_3 + \frac{\mu}{\gamma} z_4, \\ \phi_4 &= \mu^2 z_1^2 + \mu z_3.\end{aligned}$$

The Jacobian of  $\phi^{\text{DE}}$  at 0 is, up to identical row/column permutation:

$$J = \begin{bmatrix} \lambda^2 I_2 & \frac{\mu}{\gamma} I_2 \\ \mu I_2 & 0 \end{bmatrix}.$$

By direct computation, we see that  $z$  is an eigenvalue of  $J$  if and only if  $z^2 - \lambda^2 z - \frac{\mu^2}{\gamma} = 0$ . Consider the quadratic function  $f(z) = z^2 - \lambda^2 z - \frac{\mu^2}{\gamma}$  and note that  $f(0) < 0$ . Thus to check whether  $f$  has a root with magnitude greater than 1, it suffices to check its value at  $z = 1, -1$ . Note that if  $\lambda^2 + \frac{\mu^2}{\gamma} > 1$ ,  $f(1) < 0$  and thus  $J$  has an eigenvalue greater than 1. Conversely, if  $\lambda^2 + \frac{\mu^2}{\gamma} < 1$ ,  $f(1) > 0$  and  $f(-1) = 1 + \lambda^2 - \frac{\mu^2}{\gamma} > 1 - \frac{\mu^2}{\gamma} > 0$ . This completes the proof.

## C Proof of Theorem 4

We prove Theorem 4 in this Section. Recall the matrix mean square errors

$$\begin{aligned}\text{MMSE}(v; A, B) &= \frac{1}{n(n-1)} \mathbb{E} \left[ \|vv^T - \mathbb{E}[vv^T | A, B]\|_F^2 \right], \\ \text{MMSE}(v; A^G, B) &= \frac{1}{n(n-1)} \mathbb{E} \left[ \|vv^T - \mathbb{E}[vv^T | A^G, B]\|_F^2 \right].\end{aligned}$$

The following lemma is immediate from Lemma 4.6 in [DAM16].

**Lemma 19.** *Let  $\hat{v} = \hat{v}(A, B)$  be any estimator so that  $\|\hat{v}\|_2 = \sqrt{n}$ . Then*

$$\liminf_{n \rightarrow \infty} \frac{\langle \hat{v}, v \rangle}{n} > 0 \text{ in probability} \Rightarrow \limsup_{n \rightarrow \infty} \text{MMSE}(v; A, B) < 1. \quad (82)$$

Furthermore, if  $\limsup_{n \rightarrow \infty} \text{MMSE}(v; A, B) < 1$ , there exists an estimator  $\hat{s}(A, B)$  with  $\|\hat{s}(A, B)\|_2 = \sqrt{n}$  so that, in probability:

$$\liminf_{n \rightarrow \infty} \frac{\langle \hat{s}, v \rangle}{n} > 0. \quad (83)$$

Indeed, the same holds for the observation model  $A^G, B$ .

*Proof of Theorem 4.* Consider first the case  $\lambda^2 + \frac{\mu^2}{\gamma} < 1$ . For any  $\theta \in [0, \lambda]$ ,  $\theta^2 + \mu^2/\gamma < 1$  as well. Suppose we have  $A(\theta), B$  according to model (8), (9) where  $\lambda$  is replaced with  $\theta$ . By Theorem 6 (applied at  $\theta$ ) and the second part of Lemma 19,  $\liminf_{n \rightarrow \infty} \text{MMSE}(v; A(\theta), B) = 1$ . Using the I-MMSE identity [GSV05], this implies

$$\lim_{n \rightarrow \infty} \frac{1}{n} (I(v; A(\theta), B) - I(v; A(0), B)) = \frac{\theta^2}{4}. \quad (84)$$

By Theorem 5, for all  $\theta \in [0, \lambda]$

$$\lim_{d \rightarrow \infty} \lim_{n \rightarrow \infty} \frac{1}{n} (I(v; A^G(\theta), B) - I(v; A^G(0), B)) = \frac{\theta^2}{4}, \quad (85)$$

$$\text{and, therefore } \lim_{n \rightarrow \infty} \text{MMSE}(v; A^G, B) = 1 \quad (86)$$

This implies, via the first part of Lemma 19 that for any estimator  $\hat{v}(A^G, B)$ , we have  $\limsup_{n \rightarrow \infty} |\langle \hat{v}, v \rangle|/n = 0$  in probability, as required.



Conversely, consider the case  $\lambda^2 + \frac{\mu^2}{\gamma} > 1$ . We may assume that  $\mu^2/\gamma < 1$ , as otherwise the result follows from Theorem 2. Let  $\lambda_0 = (1 - \mu^2/\gamma)^{1/2}$ .

Now, by the same argument for Eqs.(84), (85), we obtain for all  $\theta_1, \theta_2 \in [\lambda_0, \lambda]$ :

$$\limsup_{n \rightarrow \infty} \frac{1}{n} (I(v; A(\theta_1), B) - I(v; A(\theta_2), B)) < \frac{\theta_1^2 - \theta_2^2}{4}. \quad (87)$$

Applying Theorem 5, we have for all  $\theta_1, \theta_2, \theta \in [\lambda_0, \lambda]$ :

$$\lim_{d \rightarrow \infty} \limsup_{n \rightarrow \infty} \frac{1}{n} (I(v; A^G(\theta_1), B) - I(v; A^G(\theta_2), B)) < \frac{\theta_1^2 - \theta_2^2}{4} \quad (88)$$

$$\text{and therefore, } \limsup \text{MMSE}(v; A^G(\theta), B) < 1. \quad (89)$$

Applying then Lemma 19 implies that we have an estimator  $\hat{s}(A^G, B)$  with non-trivial overlap i.e. in probability:

$$\lim_{d \rightarrow \infty} \liminf_{n \rightarrow \infty} \frac{\langle \hat{s}, v \rangle}{n} > 0. \quad (90)$$

This completes the proof. □

## D Belief propagation: derivation

In this section we will derive the belief propagation algorithm. Recall the observation model for  $(A^G, B) \in \mathbb{R}^{n \times n} \times \mathbb{R}^{p \times n}$  in Eqs. (1), (2):

$$A_{ij}^G = \begin{cases} 1 & \text{with probability } \frac{d + \lambda \sqrt{d} v_i v_j}{n} \\ 0 & \text{otherwise.} \end{cases} \quad (91)$$

$$B_{qi} = \sqrt{\frac{\mu}{n}} u_q v_i + Z_{qi}, \quad (92)$$

where  $u_q$  and  $Z_{qi}$  are independent  $N(0, 1/p)$  variables.

We will use the following conventions throughout this section to simplify some of the notation. We will index nodes in the graph, i.e. elements in  $[n]$  with  $i, j, k \dots$  and covariates, i.e. elements in  $[p]$  with  $q, r, s, \dots$ . We will use ‘ $\simeq$ ’ to denote equality of probability distributions (or densities) up to an omitted proportionality constant, that may change from line to line. We will omit the superscript  $G$  in  $A^G$ . In the graph  $G$ , we will denote neighbors of a node  $i$  with  $\partial i$  and non-neighbors with  $\partial i^c$ .

We start with the posterior distribution of  $u, v$  given the data  $A, B$ :

$$\text{d}\mathbb{P}\{u, v | A, B\} = \frac{\text{d}\mathbb{P}\{A, B | u, v\}}{\text{d}\mathbb{P}\{A, B\}} \text{d}\mathbb{P}\{u, v\} \quad (93)$$

$$\begin{aligned} &\simeq \prod_{i < j} \left( \frac{d + \lambda \sqrt{d} v_i v_j}{n} \right)^{A_{ij}} \left( 1 - \frac{d + \lambda \sqrt{d} v_i v_j}{n} \right)^{1 - A_{ij}} \\ &\cdot \prod_{q, i} \exp \left( \sqrt{\frac{\mu p^2}{n}} B_{qi} u_q v_i \right) \prod_q \exp \left( - \frac{p(1 + \mu)}{2} u_q^2 \right). \end{aligned} \quad (94)$$

The belief propagation algorithm operates ‘messages’  $\nu_{i \rightarrow j}^t, \nu_{q \rightarrow i}^t, \nu_{i \rightarrow q}^t$  which are probability distributions. They represent the marginals of the variables  $v_i, u_q$  in the absence of variables  $v_j, u_q$ , in the posterior distribution  $\text{d}\mathbb{P}\{u, v | A, B\}$ . We denote by  $\mathbb{E}_{i \rightarrow j}^t, \mathbb{E}_{q \rightarrow i}^t, \mathbb{E}_{i \rightarrow q}^t$  expectations with respect to

these distributions. The messages are computed using the following update equations:

$$\nu_{i \rightarrow j}^{t+1}(v_i) \simeq \prod_{q \in [p]} \mathbb{E}_{q \rightarrow i}^t \left\{ \exp \left( \sqrt{\frac{\mu p^2}{n}} B_{qi} v_i u_q \right) \right\} \prod_{k \in \partial i \setminus j} \mathbb{E}_{k \rightarrow i}^t \left( \frac{d + \lambda \sqrt{d} v_i v_k}{n} \right) \prod_{k \in \partial i^c \setminus j} \mathbb{E}_{k \rightarrow i}^t \left( 1 - \frac{d + \lambda \sqrt{d} v_i v_k}{n} \right), \quad (95)$$

$$\nu_{i \rightarrow q}^{t+1}(v_i) \simeq \prod_{r \in [p] \setminus q} \mathbb{E}_{r \rightarrow i}^t \left\{ \exp \left( \sqrt{\frac{\mu p^2}{n}} B_{ri} v_i u_r \right) \right\} \prod_{k \in \partial i} \mathbb{E}_{k \rightarrow i}^t \left( \frac{d + \lambda \sqrt{d} v_i v_k}{n} \right) \prod_{k \in \partial i^c} \mathbb{E}_{k \rightarrow i}^t \left( 1 - \frac{d + \lambda \sqrt{d} v_i v_k}{n} \right), \quad (96)$$

$$\nu_{q \rightarrow i}^{t+1}(u_q) \simeq \exp \left( -\frac{p(1+\mu)u_q^2}{2} \right) \prod_{j \neq i} \mathbb{E}_{j \rightarrow q}^t \left\{ \exp \left( \sqrt{\frac{\mu p^2}{n}} B_{qj} v_j u_q \right) \right\}. \quad (97)$$

As is standard, we define  $\nu_i^t, \nu_q^t$  in the same fashion as above, except without the removal of the incoming message.

### D.1 Reduction using Gaussian ansatz

The update rules (95), (96), (97) are in terms of probability distributions, i.e. measures on the real line or  $\{\pm 1\}$ . We reduce them to update rules on real numbers using the following analytical ansatz. The measure  $\nu_{i \rightarrow j}^t$  on  $\{\pm 1\}$  can be summarized using the log-odds ratio:

$$\eta_{i \rightarrow j}^t \equiv \frac{1}{2} \log \frac{\nu_{i \rightarrow j}^t(+1)}{\nu_{i \rightarrow j}^t(-1)}, \quad (98)$$

and we similarly define  $\eta_{i \rightarrow q}^t, \eta_i^t$ . In order to reduce the densities  $\nu_{q \rightarrow i}^t$ , we use the Gaussian ansatz:

$$\nu_{q \rightarrow i}^t = \mathcal{N} \left( \frac{m_{q \rightarrow i}^t}{\sqrt{p}}, \frac{\tau_{q \rightarrow i}^t}{p} \right). \quad (99)$$

With Equations (98) and (99) we can now simplify Equations (95) to (97). The following lemma computes the inner marginalizations in Equations (95) to (97). We omit the proof.

**Lemma 20.** *With  $\nu^t, \mathbb{E}^t$  as defined as per Equations (95) to (97) and  $\eta^t, m^t, \tau^t$  as in Equations (98) and (99) we have*

$$\mathbb{E}_{q \rightarrow i}^t \exp \left( \sqrt{\frac{\mu p^2}{n}} B_{qi} v_i u_q \right) = \exp \left( \sqrt{\frac{\mu p}{n}} B_{qi} v_i m_{q \rightarrow i}^t + \frac{\mu p}{2n} B_{qi}^2 \tau_{q \rightarrow i}^t \right), \quad (100)$$

$$\mathbb{E}_{i \rightarrow j}^t \left( \frac{d + \lambda \sqrt{d} v_i v_j}{n} \right) = \frac{d}{n} \left( 1 + \frac{\lambda v_j}{\sqrt{d}} \tanh(\eta_{i \rightarrow j}^t) \right), \quad (101)$$

$$\mathbb{E}_{i \rightarrow j}^t \left( 1 - \frac{d + \lambda \sqrt{d} v_i v_j}{n} \right) = 1 - \frac{d}{n} \left( 1 + \frac{\lambda v_j}{\sqrt{d}} \tanh(\eta_{i \rightarrow j}^t) \right), \quad (102)$$

$$\mathbb{E}_{i \rightarrow q}^t \exp \left( p \sqrt{\frac{\mu}{n}} B_{qi} v_i u_q \right) = \frac{\cosh(\eta_{i \rightarrow q}^t + p \sqrt{\mu/n} B_{qi} u_q)}{\cosh \eta_{i \rightarrow q}^t}. \quad (103)$$

The update equations take a simple form using the following definitions

$$f(z; \rho) \equiv \frac{1}{2} \log \left( \frac{\cosh(z + \rho)}{\cosh(z - \rho)} \right), \quad (104)$$

$$\rho \equiv \tanh^{-1}(\lambda/\sqrt{d}), \quad (105)$$

$$\rho_n \equiv \tanh^{-1} \left( \frac{\lambda \sqrt{d}}{n - d} \right). \quad (106)$$

With this, we first compute the update equation for the node messages  $\eta^{t+1}$ . Using Equations (95), (96) and (100) to (103):

$$\eta_{i \rightarrow j}^{t+1} = \sqrt{\frac{\mu}{\gamma}} \sum_{q \in [p]} B_{qi} m_{q \rightarrow i}^t + \sum_{k \in \partial i \setminus j} f(\eta_{k \rightarrow i}^t; \rho) - \sum_{k \in \partial i \setminus j} f(\eta_{k \rightarrow i}^t; \rho_n), \quad (107)$$

$$\eta_{i \rightarrow q}^{t+1} = \sqrt{\frac{\mu}{\gamma}} \sum_{r \in [p] \setminus q} B_{ri} m_{r \rightarrow i}^t + \sum_{k \in \partial i} f(\eta_{k \rightarrow i}^t; \rho) - \sum_{k \in \partial i^c} f(\eta_{k \rightarrow i}^t; \rho_n), \quad (108)$$

$$\eta_i^{t+1} = \sqrt{\frac{\mu}{\gamma}} \sum_{q \in [p]} B_{qi} m_{q \rightarrow i}^t + \sum_{k \in \partial i} f(\eta_{k \rightarrow i}^t; \rho) - \sum_{k \in \partial i^c} f(\eta_{k \rightarrow i}^t; \rho_n). \quad (109)$$

Now we compute the updates for  $m_{a \rightarrow i}^t, \tau_{a \rightarrow i}^t$ . We start from Equations (97) and (100), and use Taylor approximation assuming  $u_q, B_{jq}$  are both  $O(1/\sqrt{p})$ , as the ansatz (99) suggests.

$$\log \nu_{q \rightarrow i}^{t+1}(u_q) = \text{const.} + \frac{-p(1+\mu)}{2} u_q^2 + \sum_{j \in [n] \setminus i} \log \cosh \left( \eta_{j \rightarrow q}^t + p \sqrt{\frac{\mu}{n}} B_{qj} u_q \right) \quad (110)$$

$$= \text{const.} + \frac{-p(1+\mu)}{2} u_q^2 + \left( p \sqrt{\frac{\mu}{n}} \sum_{j \in [n] \setminus i} B_{qj} \tanh(\eta_{j \rightarrow q}^t) \right) u_q + \left( \frac{p^2 \mu}{2n} \sum_{j \in [n]} B_{qj}^2 \text{sech}^2(\eta_{j \rightarrow q}^t) \right) u_q^2 + O\left(\frac{1}{\sqrt{n}}\right). \quad (111)$$

Note that here we compute  $\log \nu^{t+1}$  only up to constant factors (with slight abuse of the notation ‘ $\simeq$ ’). It follows from this quadratic approximation that:

$$\tau_{q \rightarrow i}^{t+1} = \left( 1 + \mu - \frac{\mu}{\gamma} \sum_{j \in [n] \setminus i} B_{qj}^2 \text{sech}^2(\eta_{j \rightarrow q}^t) \right)^{-1}, \quad (112)$$

$$m_{q \rightarrow i}^{t+1} = \tau_{q \rightarrow i}^{t+1} \sqrt{\frac{\mu}{\gamma}} \sum_{j \in [n] \setminus i} B_{qj} \tanh(\eta_{j \rightarrow q}^t) \quad (113)$$

$$= \frac{\sqrt{\mu/\gamma} \sum_{j \in [n] \setminus i} B_{qj} \tanh(\eta_{j \rightarrow q}^t)}{1 + \mu - \mu \gamma^{-1} \sum_{j \in [n]} B_{qj}^2 \text{sech}^2(\eta_{j \rightarrow q}^t)}. \quad (114)$$

Updates computing  $m_q^{t+1}, \tau_q^{t+1}$  are analogous.

## D.2 From message passing to approximate message passing

The updates for  $\eta^t, m^t$  derived in the previous section require keeping track of  $O(np)$  messages. In this section, we further reduce the number of messages to  $O(dn + p)$ , i.e. linear in the size of the input graph observation.

The first step is to observe that the dependence of  $\eta_{i \rightarrow j}^t$  on  $j$  is negligible when  $j$  is not a neighbor of  $i$  in the graph  $G$ . This derivation is similar to the presentation in [DKMZ11]. As  $\sup_{z \in \mathbb{R}} f(z; \rho) \leq \rho$ . Therefore, if  $i, j$  are not neighbors in  $G$ :

$$\eta_{i \rightarrow j}^t = \eta_i^t - f(\eta_{j \rightarrow i}^{t-1}; \rho_n) \quad (115)$$

$$= \eta_i^t + O(\rho_n) = \eta_i^t + O\left(\frac{1}{n}\right). \quad (116)$$

Now, for a pair  $i, j$  not connected, by Taylor expansion and the fact that  $\partial_z f(z; \rho) \leq \tanh(\rho)$ ,

$$f(\eta_{i \rightarrow j}^t; \rho_n) - f(\eta_i^t; \rho_n) = O\left(\frac{\tanh(\rho_n)}{n}\right) = O\left(\frac{1}{n^2}\right). \quad (117)$$

Therefore, the update equation for  $\eta_{i \rightarrow j}^{t+1}$  satisfies:

$$\eta_{i \rightarrow j}^{t+1} = \sqrt{\frac{\mu}{\gamma}} \sum_{q \in [p]} B_{qi} m_{q \rightarrow i}^t + \sum_{k \in \partial i \setminus j} f(\eta_{k \rightarrow i}^t; \rho) - \sum_{k \in [n]} f(\eta_k^t; \rho_n) + O\left(\frac{1}{n}\right), \quad (118)$$

$$\eta_i^{t+1} = \eta_{i \rightarrow j}^{t+1} + f(\eta_{j \rightarrow i}^t; \rho). \quad (119)$$

Similarly for  $\eta_{i \rightarrow q}^{t+1}$  we have:

$$\eta_{i \rightarrow q}^{t+1} = \sqrt{\frac{\mu}{\gamma}} \sum_{r \in [p] \setminus q} B_{ri} m_{r \rightarrow i}^t + \sum_{k \in \partial i} f(\eta_{k \rightarrow i}^t; \rho) - \sum_{k \in [n]} f(\eta_k^t; \rho_n) + O\left(\frac{1}{n}\right). \quad (120)$$

Ignoring  $O(1/n)$  correction term, the update equations reduce to variables  $(\eta_{i \rightarrow j}^t, \eta_i^t)$  where  $i, j$  are neighbors.

We now move to reduce updates for  $\eta_{i \rightarrow q}^t$  and  $m_{q \rightarrow i}^t$  to involving  $O(n)$  variables. This reduction is more subtle than that of  $\eta_{i \rightarrow j}^t$ , where we are able to simply ignore the dependence of  $\eta_{i \rightarrow j}^t$  on  $j$  if  $j \notin \partial i$ . We follow a derivation similar to that in [Mon12]. We use the ansatz:

$$\eta_{i \rightarrow q}^t = \eta_i^t + \delta \eta_{i \rightarrow q}^t \quad (121)$$

$$m_{q \rightarrow i}^t = m_q^t + \delta m_{q \rightarrow i}^t \quad (122)$$

$$\tau_{q \rightarrow i}^t = \tau_q^t + \delta \tau_{q \rightarrow i}^t, \quad (123)$$

where the corrections  $\delta \eta_{i \rightarrow q}^t, \delta m_{q \rightarrow i}^t, \delta \tau_{q \rightarrow i}^t$  are  $O(1/\sqrt{n})$ . From Equations (97) and (120) at iteration  $t$ :

$$\begin{aligned} \eta_i^t + \delta \eta_{i \rightarrow q}^t &= \sqrt{\frac{\mu}{\gamma}} \sum_{r \in [p] \setminus q} B_{ri} (m_r^{t-1} + \delta m_{r \rightarrow i}^{t-1}) + \sum_{k \in \partial i} f(\eta_{k \rightarrow i}^{t-1}; \rho) - \sum_k f(\eta_k^{t-1}; \rho_n) \\ &= \sqrt{\frac{\mu}{\gamma}} \sum_{r \in [p]} B_{ri} (m_r^{t-1} + \delta m_{r \rightarrow i}^{t-1}) + \sum_{k \in \partial i} f(\eta_{k \rightarrow i}^{t-1}; \rho) - \sum_k f(\eta_k^{t-1}; \rho_n) - \sqrt{\frac{\mu}{\gamma}} (B_{qi} m_q^{t-1} + B_{qi} \delta m_{q \rightarrow i}^{t-1}). \end{aligned} \quad (124)$$

$$(125)$$

Notice that the last term is the only term that depends on  $q$ . Further, since  $B_{qi} \delta m_{q \rightarrow i}^{t-1} = O(1/n)$  by our ansatz, we may safely ignore it to obtain

$$\eta_i^t = \sqrt{\frac{\mu}{\gamma}} \sum_{r \in [p]} B_{ri} (m_r^{t-1} + \delta m_{r \rightarrow i}^{t-1}) + \sum_{k \in \partial i} f(\eta_{k \rightarrow i}^{t-1}; \rho) - \sum_k f(\eta_k^{t-1}; \rho_n) \quad (126)$$

$$\delta \eta_{i \rightarrow q}^t = -\sqrt{\frac{\mu}{\gamma}} B_{qi} m_q^{t-1}. \quad (127)$$

We now use the update equation for  $\tau_{q \rightarrow i}^{t+1}$ :

$$\tau_q^{t+1} = \left( 1 + \mu - \frac{\mu}{\gamma} \sum_{j \in [n]} B_{qj}^2 \text{sech}^2(\eta_j^t + \delta \eta_{j \rightarrow q}^t) \right)^{-1} + O(1/n) \quad (128)$$

$$= \left( 1 + \mu - \frac{\mu}{\gamma} \sum_{j \in [n]} B_{qj}^2 ((\text{sech}^2(\eta_j^t) - 2 \text{sech}^2(\eta_j^t) \tanh(\eta_j^t) \delta \eta_{j \rightarrow q}^t) \right)^{-1} + O(1/n), \quad (129)$$

where we expanded the equation to linear order in  $\delta \eta_{i \rightarrow q}^t$  and ignored higher order terms. By the identification Equation (127):

$$\tau_q^{t+1} = \left( 1 + \mu - \frac{\mu}{\gamma} \sum_{j \in [n]} B_{qj}^2 \text{sech}^2(\eta_j^t) + 2 \left( \frac{\mu}{\gamma} \right)^{3/2} \sum_{j \in [n]} B_{qj}^3 \text{sech}^2(\eta_j^t) \tanh(\eta_j^t) m_q^{t-1} \right)^{-1} + O(1/n). \quad (130)$$

Notice here, that there is no term that explicitly depends on  $i$  and the final term is  $O(1/\sqrt{n})$  since  $B_{qj} = O(1/\sqrt{n})$ . Therefore, ignoring lower order terms, we have the identification:

$$\tau_q^{t+1} = \left( 1 + \mu - \frac{\mu}{\gamma} \sum_{j \in [n]} B_{qj}^2 \text{sech}^2(\eta_j^t) \right)^{-1}, \quad (131)$$

$$\delta \tau_{q \rightarrow i}^{t+1} = 0. \quad (132)$$

Now we simplify the update for  $m_{q \rightarrow i}^{t+1}$  using Taylor expansion to first order:

$$m_q^{t+1} + \delta m_{q \rightarrow i}^{t+1} = \frac{\sqrt{\mu/\gamma}}{\tau_q^{t+1}} \sum_{j \in [n] \setminus i} B_{qj} \tanh(\eta_j^t + \delta \eta_{j \rightarrow q}^t) \quad (133)$$

$$= \frac{\sqrt{\mu/\gamma}}{\tau_q^{t+1}} \sum_{j \in [n] \setminus i} (B_{qj} \tanh(\eta_j^t) + B_{qj} \text{sech}^2(\eta_j^t) \delta \eta_{j \rightarrow q}^t) \quad (134)$$

$$= \frac{\sqrt{\mu/\gamma}}{\tau_q^{t+1}} \sum_{j \in [n] \setminus i} \left( B_{qj} \tanh(\eta_j^t) - \sqrt{\frac{\mu}{\gamma}} B_{qj}^2 \text{sech}^2(\eta_j^t) m_q^{t-1} \right) \quad (135)$$

$$= \frac{\sqrt{\mu/\gamma}}{\tau_q^{t+1}} \sum_{j \in [n]} B_{qj} \tanh(\eta_j^t) - \frac{\mu}{\gamma \tau_q^{t+1}} \left( \sum_{j \in [n]} B_{qj}^2 \text{sech}^2(\eta_j^t) \right) m_q^{t-1} \\ - \frac{\sqrt{\mu/\gamma}}{\tau_q^{t+1}} (B_{qi} \tanh(\eta_i^t) - \sqrt{\mu/\gamma} B_{qi}^2 \text{sech}^2(\eta_i^t) m_q^{t-1}). \quad (136)$$

Only the final term is dependent on  $i$ , therefore we can identify:

$$m_q^{t+1} = \frac{\sqrt{\mu/\gamma}}{\tau_q^{t+1}} \sum_{j \in [n]} B_{qj} \tanh(\eta_j^t) - \frac{\mu}{\gamma \tau_q^{t+1}} \left( \sum_{j \in [n]} B_{qj}^2 \text{sech}^2(\eta_j^t) \right) m_q^{t-1}, \quad (137)$$

$$\delta m_{q \rightarrow i}^{t+1} = - \frac{\sqrt{\mu/\gamma}}{\tau_q^{t+1}} B_{qi} \tanh(\eta_i^t). \quad (138)$$

Here, as before, we ignore the lower order term in  $\delta m_{q \rightarrow i}^{t+1}$ . Now we can substitute the identification Equation (138) back in Equation (126) at iteration  $t + 1$ :

$$\eta_i^{t+1} = \sqrt{\frac{\mu}{\gamma}} \sum_{r \in [p]} B_{ri} m_r^t - \frac{\mu}{\gamma} \sum_{r \in [p]} \frac{B_{ri}^2}{\tau_r^t} \tanh(\eta_i^{t-1}) + \sum_{k \in \partial i} f(\eta_{k \rightarrow i}^t; \rho) - \sum_k f(\eta_k^t; \rho_n). \quad (139)$$

Collecting the updates for  $\eta_i^t, \eta_{i \rightarrow j}^t, m_q^t$  we obtain the approximate message passing algorithm:

$$\eta_i^{t+1} = \sqrt{\frac{\mu}{\gamma}} \sum_{q \in [p]} B_{qi} m_q^t - \frac{\mu}{\gamma} \left( \sum_{q \in [p]} \frac{B_{qi}^2}{\tau_q^t} \right) \tanh(\eta_i^{t-1}) + \sum_{k \in \partial i} f(\eta_{k \rightarrow i}^t; \rho) - \sum_{k \in [n]} f(\eta_k^t; \rho_n), \quad (140)$$

$$\eta_{i \rightarrow j}^{t+1} = \sqrt{\frac{\mu}{\gamma}} \sum_{q \in [p]} B_{qi} m_q^t - \frac{\mu}{\gamma} \left( \sum_{q \in [p]} \frac{B_{qi}^2}{\tau_q^t} \right) \tanh(\eta_i^{t-1}) + \sum_{k \in \partial i \setminus j} f(\eta_{k \rightarrow i}^t; \rho) - \sum_{k \in [n]} f(\eta_k^t; \rho_n), \quad (141)$$

$$m_q^{t+1} = \frac{\sqrt{\mu/\gamma}}{\tau_q^{t+1}} \sum_{j \in [n]} B_{qj} \tanh(\eta_j^t) - \frac{\mu}{\gamma \tau_q^{t+1}} \left( \sum_{j \in [n]} B_{qj}^2 \text{sech}^2(\eta_j^t) \right) m_q^{t-1} \quad (142)$$

$$\tau_q^{t+1} = \left( 1 + \mu - \frac{\mu}{\gamma} \sum_{j \in [n]} B_{qj}^2 \text{sech}^2(\eta_j^t) \right)^{-1}. \quad (143)$$

### D.3 Linearized approximate message passing

This algorithm results from expanding the updates Equations (140) to (143) to linear order in the messages  $\eta_i^t, \eta_{i \rightarrow j}^t$ :

$$\eta_i^{t+1} = \sqrt{\frac{\mu}{\gamma}} \sum_{q \in [p]} B_{qi} m_q^t - \frac{\mu}{\gamma} \left( \sum_{q \in [p]} \frac{B_{qi}^2}{\tau_q^t} \right) \eta_i^{t-1} + \frac{\lambda}{\sqrt{d}} \sum_{k \in \partial i} \eta_{k \rightarrow i}^t - \frac{\lambda \sqrt{d}}{n} \sum_{k \in [n]} \eta_k^t \quad (144)$$

$$\eta_{i \rightarrow j}^{t+1} = \sqrt{\frac{\mu}{\gamma}} \sum_{q \in [p]} B_{qi} m_q^t - \frac{\mu}{\gamma} \left( \sum_{q \in [p]} \frac{B_{qi}^2}{\tau_q^t} \right) \eta_i^{t-1} + \frac{\lambda}{\sqrt{d}} \sum_{k \in \partial i \setminus j} \eta_{k \rightarrow i}^t - \frac{\lambda \sqrt{d}}{n} \sum_{k \in [n]} \eta_k^t \quad (145)$$

$$m_q^{t+1} = \frac{\sqrt{\mu/\gamma}}{\tau_q^{t+1}} \sum_{j \in [n]} B_{qj} \eta_j^t - \frac{\mu}{\gamma \tau_q^{t+1}} \left( \sum_{j \in [n]} B_{qj}^2 \right) m_q^{t-1} \quad (146)$$

$$\tau_q^{t+1} = \left( 1 + \mu - \frac{\mu}{\gamma} \sum_{j \in [n]} B_{qj}^2 \right)^{-1}. \quad (147)$$

This follows from the linear approximation  $f(z; \rho) = \tanh(\rho)z$  for small  $z$ . The algorithm given in the main text follows by using the law of large numbers to approximate  $\sum_{j \in [n]} B_{qj}^2 \approx 1/\gamma$ ,  $\sum_{q \in [p]} B_{qj}^2 \approx 1$ , and hence  $\tau_q \approx 1$ .
